# Supplementary material for: Mechanisms underlying the acid leaching process for LiNi0.6Co0.2Mn0.2O2 with and without H2O2
Source: Royal Society of Chemistry journal article supplement (doi:10.1039/d4ya00049h), 2024-01-01
Supplement: d4ya00049h1.pdf [file d4ya00049h1.pdf]

# Supplementary Information

## Mechanisms underlying the leaching process for **LiNi<sub>0.6</sub>Co<sub>0.2</sub>Mn<sub>0.2</sub>O<sub>2</sub> with and without H<sub>2</sub>O<sub>2</sub>**

Kazuhiko Mukai,\* Yasuhiro Takatani, and Takamasa Nonaka

*Toyota Central Research and Development Laboratories, Incorporated, 41-1 Yokomichi,  
Nagakute, Aichi 480-1192, Japan*

\*E-mail: e1089@mosk.tytlabs.co.jp

---

\*To whom correspondence should be addressed

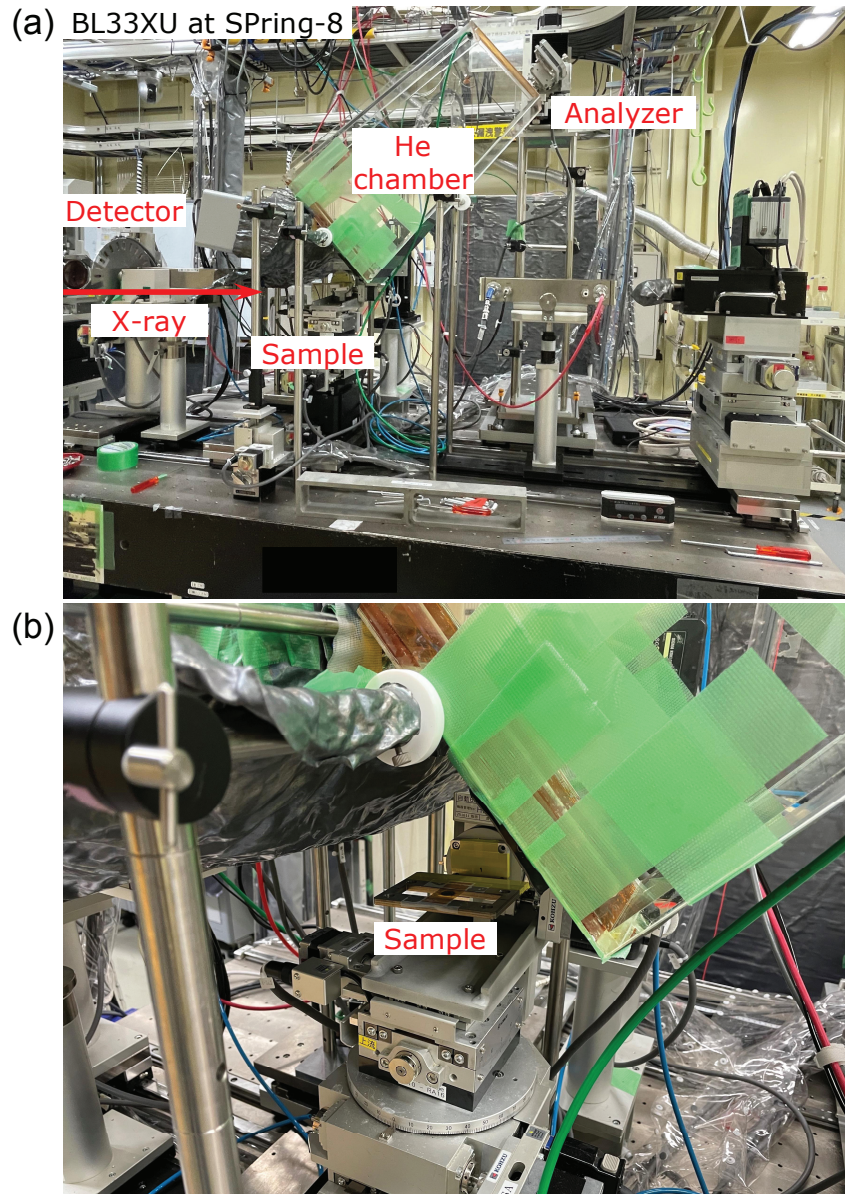

**Fig. S1:** Setup for the XRS measurements: (a) overall and (b) enlarged photograph of the sample holder.



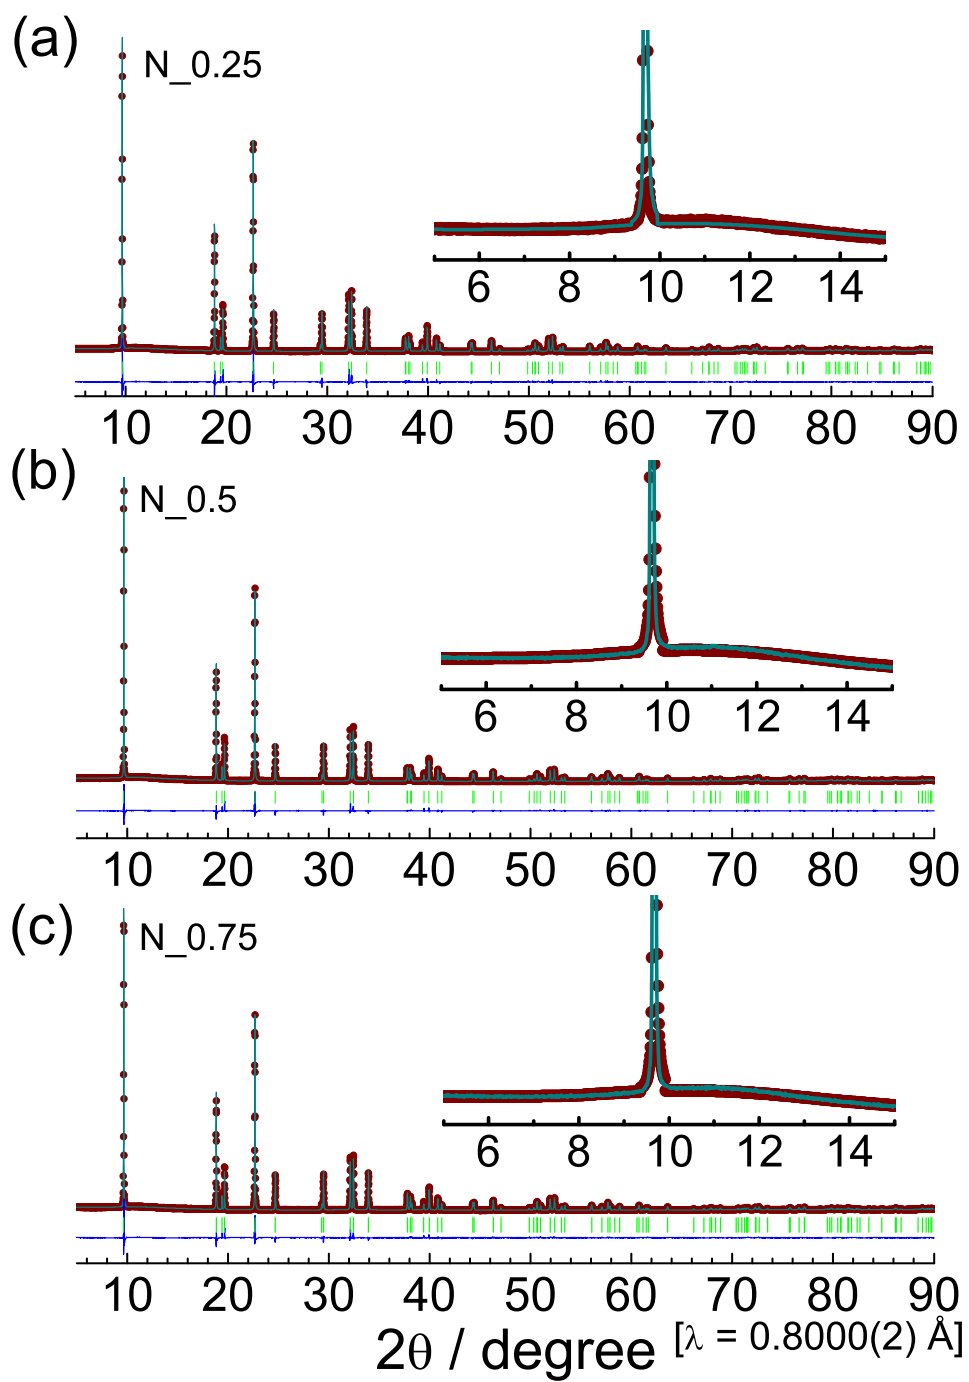

**Fig. S2:** Rietveld analysis results after HNO<sub>3</sub> leaching without H<sub>2</sub>O<sub>2</sub>: (a) N<sub>0.25</sub>, (b) N<sub>0.5</sub>, and (c) N<sub>0.75</sub>.

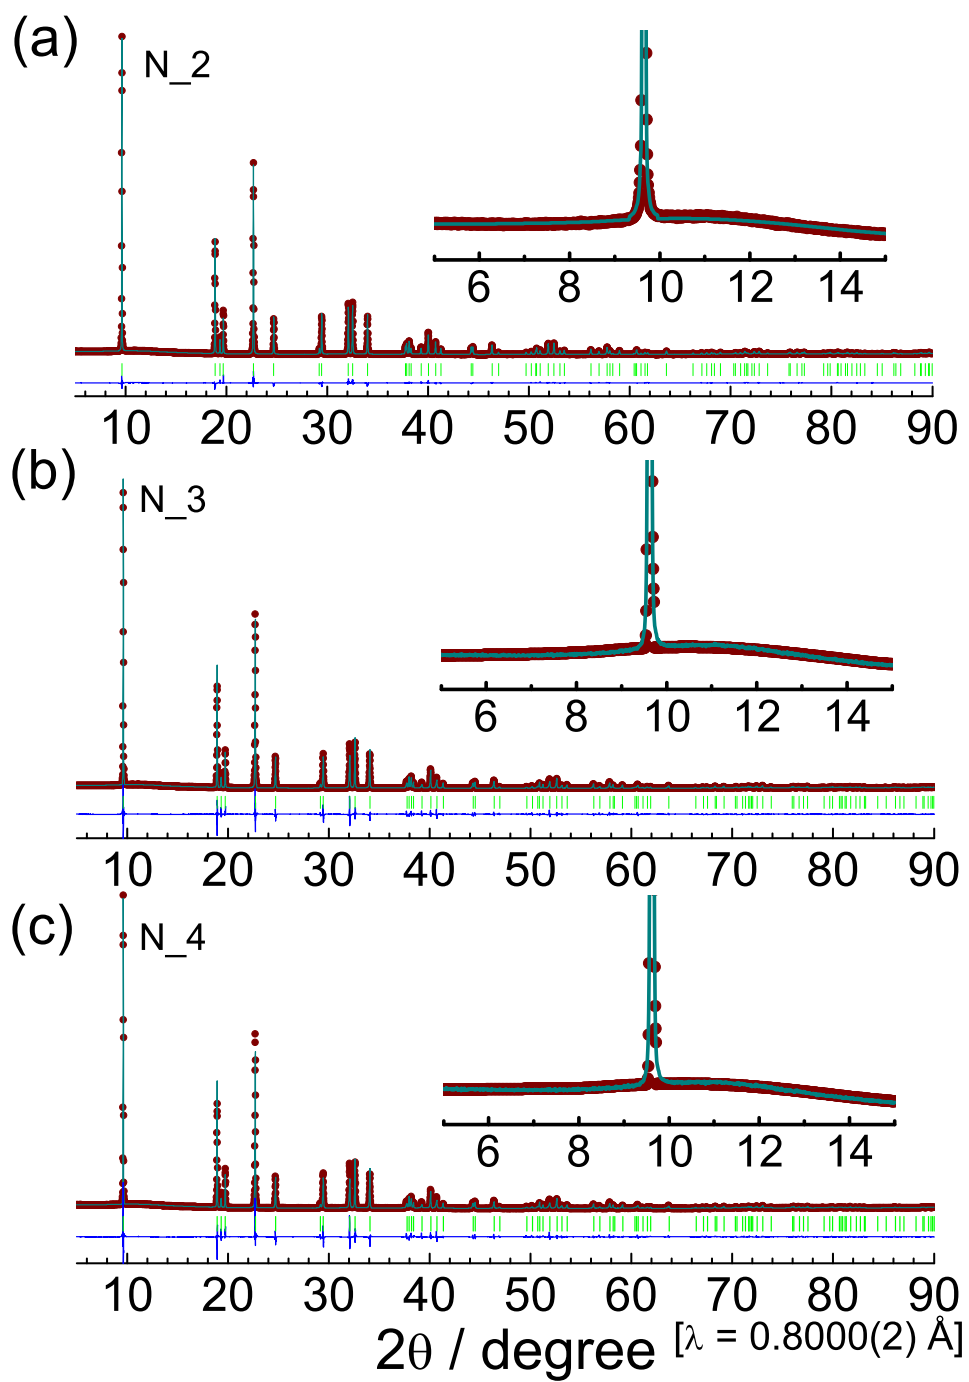

**Fig. S3:** Rietveld analysis results after HNO<sub>3</sub> leaching without H<sub>2</sub>O<sub>2</sub>: (a) N<sub>2</sub>, (b) N<sub>3</sub>, and (c) N<sub>4</sub>.

**Table S1:** Structural parameters of N\_0.25, N\_0.5, N\_0.75, and N\_1.5 as determined by Rietveld analyses<sup>a</sup>

| Sample                                                                                                                                                        | Phase  | Atom | Wyckoff position | $g$  | $x$ | $y$ | $z$      | $B_{\text{iso}}$ ( $\text{\AA}^2$ ) |
|---------------------------------------------------------------------------------------------------------------------------------------------------------------|--------|------|------------------|------|-----|-----|----------|-------------------------------------|
| N_0.25                                                                                                                                                        | NCM622 | Li   | $3b$             | 1.0  | 0   | 0   | 0.5      | 1.0                                 |
|                                                                                                                                                               |        | Ni   | $3a$             | 0.6  | 0   | 0   | 0        | 0.2(1)                              |
|                                                                                                                                                               |        | Co   | $3a$             | 0.2  | 0   | 0   | 0        | 0.2(1)                              |
|                                                                                                                                                               |        | Mn   | $3a$             | 0.2  | 0   | 0   | 0        | 0.2(1)                              |
|                                                                                                                                                               |        | O    | $6c$             | 1.0  | 0   | 0   | 0.258(1) | 0.4(1)                              |
| Space group: $R\bar{3}m$ , $a_{\text{h}} = 2.8658(1)$ $\text{\AA}$ , and $c_{\text{h}} = 14.229(1)$ $\text{\AA}$<br>$R_{\text{wp}} = 7.74$ % and $S = 0.93$ . |        |      |                  |      |     |     |          |                                     |
| N_0.5                                                                                                                                                         | NCM622 | Li   | $3b$             | 1.0  | 0   | 0   | 0.5      | 1.0                                 |
|                                                                                                                                                               |        | Ni   | $3a$             | 0.6  | 0   | 0   | 0        | 0.3(1)                              |
|                                                                                                                                                               |        | Co   | $3a$             | 0.2  | 0   | 0   | 0        | 0.3(1)                              |
|                                                                                                                                                               |        | Mn   | $3a$             | 0.2  | 0   | 0   | 0        | 0.3(1)                              |
|                                                                                                                                                               |        | O    | $6c$             | 1.0  | 0   | 0   | 0.259(1) | 0.5(1)                              |
| Space group: $R\bar{3}m$ , $a_{\text{h}} = 2.8646(1)$ $\text{\AA}$ , and $c_{\text{h}} = 14.229(1)$ $\text{\AA}$<br>$R_{\text{wp}} = 5.80$ % and $S = 0.71$ . |        |      |                  |      |     |     |          |                                     |
| N_0.75                                                                                                                                                        | NCM622 | Li   | $3b$             | 0.97 | 0   | 0   | 0.5      | 1.0                                 |
|                                                                                                                                                               |        | Ni   | $3a$             | 0.6  | 0   | 0   | 0        | 0.3(1)                              |
|                                                                                                                                                               |        | Co   | $3a$             | 0.2  | 0   | 0   | 0        | 0.3(1)                              |
|                                                                                                                                                               |        | Mn   | $3a$             | 0.2  | 0   | 0   | 0        | 0.3(1)                              |
|                                                                                                                                                               |        | O    | $6c$             | 1.0  | 0   | 0   | 0.259(1) | 0.5(1)                              |
| Space group: $R\bar{3}m$ , $a_{\text{h}} = 2.8639(1)$ $\text{\AA}$ , and $c_{\text{h}} = 14.236(1)$ $\text{\AA}$<br>$R_{\text{wp}} = 6.29$ % and $S = 0.77$ . |        |      |                  |      |     |     |          |                                     |
| N_1.5                                                                                                                                                         | NCM622 | Li   | $3b$             | 1.0  | 0   | 0   | 0.5      | 1.0                                 |
|                                                                                                                                                               |        | Ni   | $3a$             | 0.6  | 0   | 0   | 0        | 0.3(1)                              |
|                                                                                                                                                               |        | Co   | $3a$             | 0.2  | 0   | 0   | 0        | 0.3(1)                              |
|                                                                                                                                                               |        | Mn   | $3a$             | 0.2  | 0   | 0   | 0        | 0.3(1)                              |
|                                                                                                                                                               |        | O    | $6c$             | 1.0  | 0   | 0   | 0.260(1) | 0.5(1)                              |
| Space group: $R\bar{3}m$ , $a_{\text{h}} = 2.8582(1)$ $\text{\AA}$ , and $c_{\text{h}} = 14.269(1)$ $\text{\AA}$<br>$R_{\text{wp}} = 3.74$ % and $S = 0.45$ . |        |      |                  |      |     |     |          |                                     |

<sup>a</sup> $R_{\text{wp}}$  and  $S$  are the weighted reliability index and goodness-of-fit indicator, respectively, in the Rietveld analysis.

**Table S2:** Structural parameters of N\_2, N\_3, N\_4, and N\_8 as determined by Rietveld analyses<sup>a</sup>

| Sample                                                                                                                                                                                                                                                                                                            | Phase                        | Atom | Wyckoff position | $g$  | $x$ | $y$ | $z$      | $B_{\text{iso}}$ ( $\text{\AA}^2$ ) |
|-------------------------------------------------------------------------------------------------------------------------------------------------------------------------------------------------------------------------------------------------------------------------------------------------------------------|------------------------------|------|------------------|------|-----|-----|----------|-------------------------------------|
| N_2                                                                                                                                                                                                                                                                                                               | NCM622                       | Li   | $3b$             | 1.0  | 0   | 0   | 0.5      | 1.0                                 |
|                                                                                                                                                                                                                                                                                                                   |                              | Ni   | $3a$             | 0.6  | 0   | 0   | 0        | 0.2(1)                              |
|                                                                                                                                                                                                                                                                                                                   |                              | Co   | $3a$             | 0.2  | 0   | 0   | 0        | 0.2(1)                              |
|                                                                                                                                                                                                                                                                                                                   |                              | Mn   | $3a$             | 0.2  | 0   | 0   | 0        | 0.2(1)                              |
|                                                                                                                                                                                                                                                                                                                   |                              | O    | $6c$             | 1.0  | 0   | 0   | 0.260(1) | 0.5(1)                              |
| Space group: $R\bar{3}m$ , $a_{\text{h}} = 2.8571(1)$ $\text{\AA}$ , and $c_{\text{h}} = 14.270(1)$ $\text{\AA}$<br>$R_{\text{wp}} = 4.00$ % and $S = 0.49$ .                                                                                                                                                     |                              |      |                  |      |     |     |          |                                     |
| N_3                                                                                                                                                                                                                                                                                                               | NCM622                       | Li   | $3b$             | 0.97 | 0   | 0   | 0.5      | 1.0                                 |
|                                                                                                                                                                                                                                                                                                                   |                              | Ni   | $3a$             | 0.6  | 0   | 0   | 0        | 0.2(1)                              |
|                                                                                                                                                                                                                                                                                                                   |                              | Co   | $3a$             | 0.2  | 0   | 0   | 0        | 0.2(1)                              |
|                                                                                                                                                                                                                                                                                                                   |                              | Mn   | $3a$             | 0.2  | 0   | 0   | 0        | 0.2(1)                              |
|                                                                                                                                                                                                                                                                                                                   |                              | O    | $6c$             | 1.0  | 0   | 0   | 0.261(1) | 0.4(1)                              |
| Space group: $R\bar{3}m$ , $a_{\text{h}} = 2.8499(1)$ $\text{\AA}$ , and $c_{\text{h}} = 14.287(1)$ $\text{\AA}$<br>$R_{\text{wp}} = 10.6$ % and $S = 1.31$ .                                                                                                                                                     |                              |      |                  |      |     |     |          |                                     |
| N_4                                                                                                                                                                                                                                                                                                               | NCM622                       | Li   | $3b$             | 0.97 | 0   | 0   | 0.5      | 1.0                                 |
|                                                                                                                                                                                                                                                                                                                   |                              | Ni   | $3a$             | 0.6  | 0   | 0   | 0        | 0.3(1)                              |
|                                                                                                                                                                                                                                                                                                                   |                              | Co   | $3a$             | 0.2  | 0   | 0   | 0        | 0.3(1)                              |
|                                                                                                                                                                                                                                                                                                                   |                              | Mn   | $3a$             | 0.2  | 0   | 0   | 0        | 0.3(1)                              |
|                                                                                                                                                                                                                                                                                                                   |                              | O    | $6c$             | 1.0  | 0   | 0   | 0.259(1) | 0.5(1)                              |
| Space group: $R\bar{3}m$ , $a_{\text{h}} = 2.8495(1)$ $\text{\AA}$ , and $c_{\text{h}} = 14.290(1)$ $\text{\AA}$<br>$R_{\text{wp}} = 8.15$ % and $S = 1.23$ .                                                                                                                                                     |                              |      |                  |      |     |     |          |                                     |
| N_8                                                                                                                                                                                                                                                                                                               | NCM622<br>(98.7 wt%)         | Li   | $3b$             | 0.26 | 0   | 0   | 0.5      | 1.0                                 |
|                                                                                                                                                                                                                                                                                                                   |                              | Ni   | $3a$             | 0.6  | 0   | 0   | 0        | 0.4(1)                              |
|                                                                                                                                                                                                                                                                                                                   |                              | Co   | $3a$             | 0.19 | 0   | 0   | 0        | 0.4(1)                              |
|                                                                                                                                                                                                                                                                                                                   |                              | Mn   | $3a$             | 0.2  | 0   | 0   | 0        | 0.4(1)                              |
|                                                                                                                                                                                                                                                                                                                   |                              | O    | $6c$             | 1.0  | 0   | 0   | 0.265(1) | 0.3(1)                              |
|                                                                                                                                                                                                                                                                                                                   | $\gamma$ -NiOOH<br>(1.3 wt%) | Ni   | $3a$             | 1    | 0   | 0   | 0        | 0.4(1)                              |
|                                                                                                                                                                                                                                                                                                                   |                              | O    | $6c$             | 1    | 0   | 0   | 0.370(4) | 0.3(1)                              |
| Space group: $R\bar{3}m$ , $a_{\text{h}} = 2.8213(1)$ $\text{\AA}$ , and $c_{\text{h}} = 14.482(1)$ $\text{\AA}$ for NCM622<br>Space group: $R\bar{3}m$ , $a_{\text{h}} = 2.813(18)$ $\text{\AA}$ , and $c_{\text{h}} = 20.747(24)$ $\text{\AA}$ for $\gamma$ -NiOOH<br>$R_{\text{wp}} = 4.96$ % and $S = 0.64$ . |                              |      |                  |      |     |     |          |                                     |

<sup>a</sup> $R_{\text{wp}}$  and  $S$  are the weighted reliability index and goodness-of-fit indicator, respectively, in the Rietveld analysis.



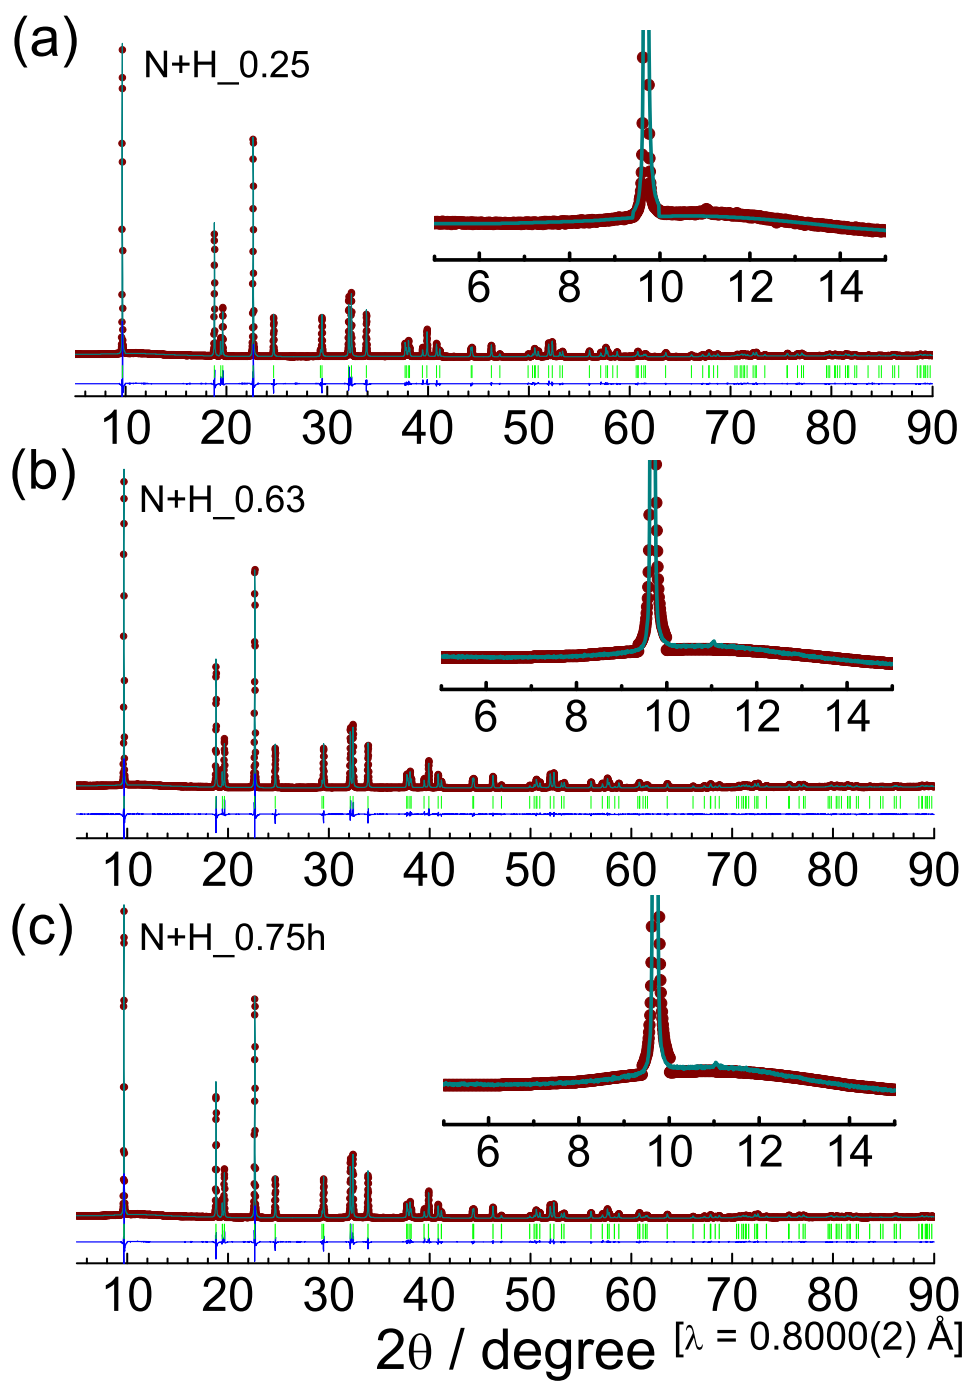

**Fig. S4:** Rietveld analysis results after  $\text{HNO}_3$  leaching with  $\text{H}_2\text{O}_2$ : (a) N+H.0.25, (b) N+H.0.63, and (c) N+H.0.75.

**Table S3:** Structural parameters of N+H.0.25, N+H.0.5, N+H.0.63, N+H.0.75, and N+H.2 as determined by Rietveld analyses<sup>a</sup>

| Sample                                                                                                                                      | Phase  | Atom | Wyckoff position | $g$  | $x$ | $y$ | $z$      | $B_{\text{iso}}$ ( $\text{\AA}^2$ ) |
|---------------------------------------------------------------------------------------------------------------------------------------------|--------|------|------------------|------|-----|-----|----------|-------------------------------------|
| N+H.0.25                                                                                                                                    | NCM622 | Li   | $3b$             | 1.0  | 0   | 0   | 0.5      | 1.0                                 |
|                                                                                                                                             |        | Ni   | $3a$             | 0.6  | 0   | 0   | 0        | 0.2(1)                              |
|                                                                                                                                             |        | Co   | $3a$             | 0.2  | 0   | 0   | 0        | 0.2(1)                              |
|                                                                                                                                             |        | Mn   | $3a$             | 0.2  | 0   | 0   | 0        | 0.2(1)                              |
|                                                                                                                                             |        | O    | $6c$             | 1.0  | 0   | 0   | 0.259(1) | 0.4(1)                              |
| Space group: $R\bar{3}m$ , $a_h = 2.8678(1)$ $\text{\AA}$ , and $c_h = 14.219(1)$ $\text{\AA}$<br>$R_{\text{wp}} = 9.07$ % and $S = 1.21$ . |        |      |                  |      |     |     |          |                                     |
| N+H.0.5                                                                                                                                     | NCM622 | Li   | $3b$             | 1.0  | 0   | 0   | 0.5      | 1.0                                 |
|                                                                                                                                             |        | Ni   | $3a$             | 0.6  | 0   | 0   | 0        | 0.3(1)                              |
|                                                                                                                                             |        | Co   | $3a$             | 0.2  | 0   | 0   | 0        | 0.3(1)                              |
|                                                                                                                                             |        | Mn   | $3a$             | 0.2  | 0   | 0   | 0        | 0.3(1)                              |
|                                                                                                                                             |        | O    | $6c$             | 1.0  | 0   | 0   | 0.259(1) | 0.5(1)                              |
| Space group: $R\bar{3}m$ , $a_h = 2.8678(1)$ $\text{\AA}$ , and $c_h = 14.219(1)$ $\text{\AA}$<br>$R_{\text{wp}} = 8.09$ % and $S = 1.10$ . |        |      |                  |      |     |     |          |                                     |
| N+H.0.63                                                                                                                                    | NCM622 | Li   | $3b$             | 0.97 | 0   | 0   | 0.5      | 1.0                                 |
|                                                                                                                                             |        | Ni   | $3a$             | 0.6  | 0   | 0   | 0        | 0.3(1)                              |
|                                                                                                                                             |        | Co   | $3a$             | 0.2  | 0   | 0   | 0        | 0.3(1)                              |
|                                                                                                                                             |        | Mn   | $3a$             | 0.2  | 0   | 0   | 0        | 0.3(1)                              |
|                                                                                                                                             |        | O    | $6c$             | 1.0  | 0   | 0   | 0.259(1) | 0.5(1)                              |
| Space group: $R\bar{3}m$ , $a_h = 2.8676(1)$ $\text{\AA}$ , and $c_h = 14.219(1)$ $\text{\AA}$<br>$R_{\text{wp}} = 8.77$ % and $S = 1.21$ . |        |      |                  |      |     |     |          |                                     |
| N+H.0.75                                                                                                                                    | NCM622 | Li   | $3b$             | 1.0  | 0   | 0   | 0.5      | 1.0                                 |
|                                                                                                                                             |        | Ni   | $3a$             | 0.6  | 0   | 0   | 0        | 0.3(1)                              |
|                                                                                                                                             |        | Co   | $3a$             | 0.2  | 0   | 0   | 0        | 0.3(1)                              |
|                                                                                                                                             |        | Mn   | $3a$             | 0.2  | 0   | 0   | 0        | 0.3(1)                              |
|                                                                                                                                             |        | O    | $6c$             | 1.0  | 0   | 0   | 0.259(1) | 0.5(1)                              |
| Space group: $R\bar{3}m$ , $a_h = 2.8676(1)$ $\text{\AA}$ , and $c_h = 14.219(1)$ $\text{\AA}$<br>$R_{\text{wp}} = 8.98$ % and $S = 1.34$ . |        |      |                  |      |     |     |          |                                     |
| N+H.2                                                                                                                                       | NCM622 | Li   | $3b$             | 1.0  | 0   | 0   | 0.5      | 1.0                                 |
|                                                                                                                                             |        | Ni   | $3a$             | 0.6  | 0   | 0   | 0        | 0.4(1)                              |
|                                                                                                                                             |        | Co   | $3a$             | 0.2  | 0   | 0   | 0        | 0.4(1)                              |
|                                                                                                                                             |        | Mn   | $3a$             | 0.2  | 0   | 0   | 0        | 0.4(1)                              |
|                                                                                                                                             |        | O    | $6c$             | 1.0  | 0   | 0   | 0.260(1) | 0.6(1)                              |
| Space group: $R\bar{3}m$ , $a_h = 2.8679(1)$ $\text{\AA}$ , and $c_h = 14.219(1)$ $\text{\AA}$<br>$R_{\text{wp}} = 5.76$ % and $S = 0.75$ . |        |      |                  |      |     |     |          |                                     |

<sup>a</sup> $R_{\text{wp}}$  and  $S$  are the weighted reliability index and goodness-of-fit indicator, respectively, in the Rietveld analysis.

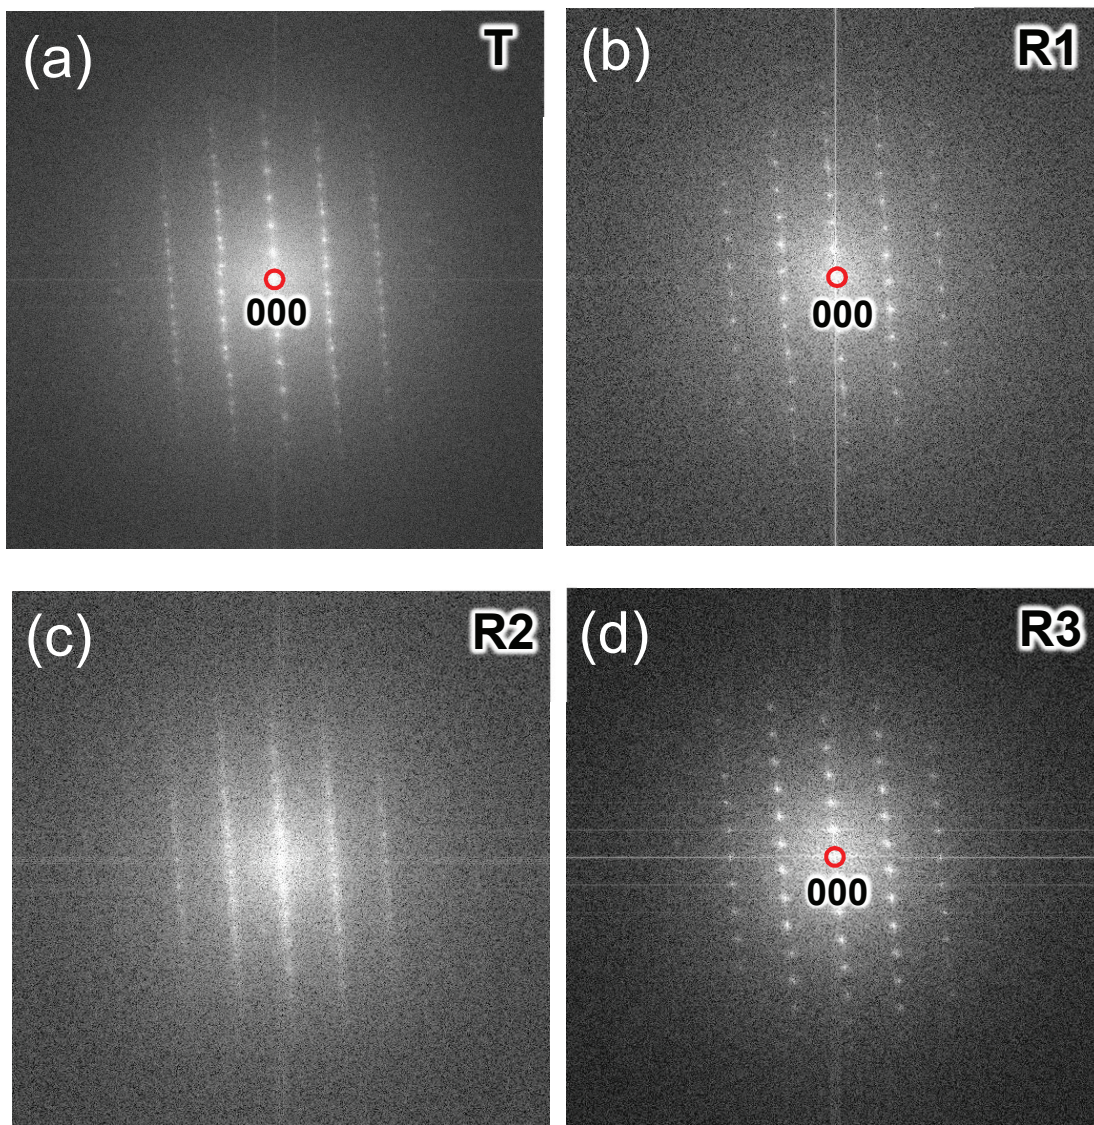

**Fig. S5:** Original FFT patterns obtained in the  $[100]$  or  $[110]$  direction from (a) the total area and from the regions labeled (c) R1, (d) R2, and (e) R3.

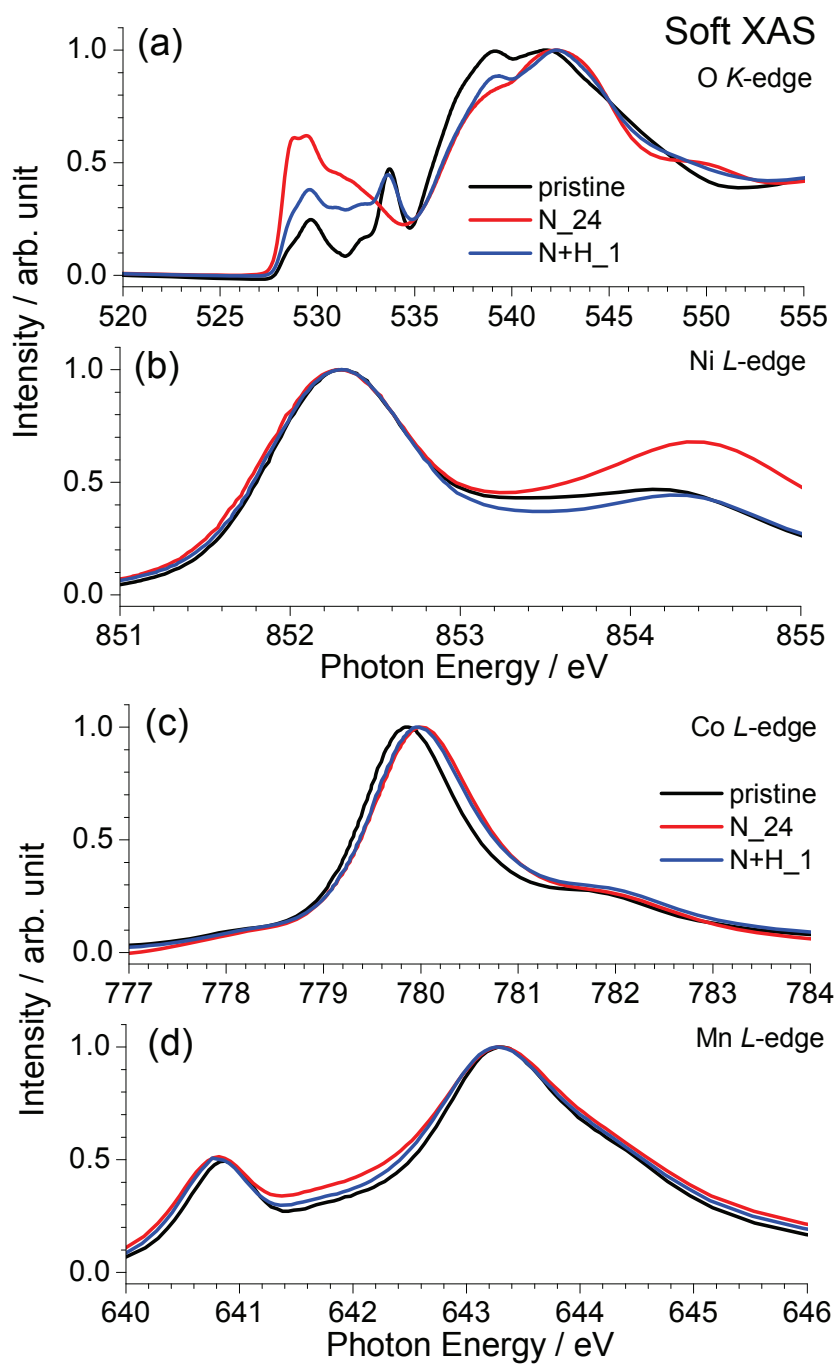

**Fig. S6:** Enlarged XANES spectra of pristine NCM622, N<sub>24</sub>, and N+H<sub>1</sub>: (a) O *K*-edge, (b) Ni *L*-edge, (c) Co *L*-edge, and (d) Mn *L*-edge.



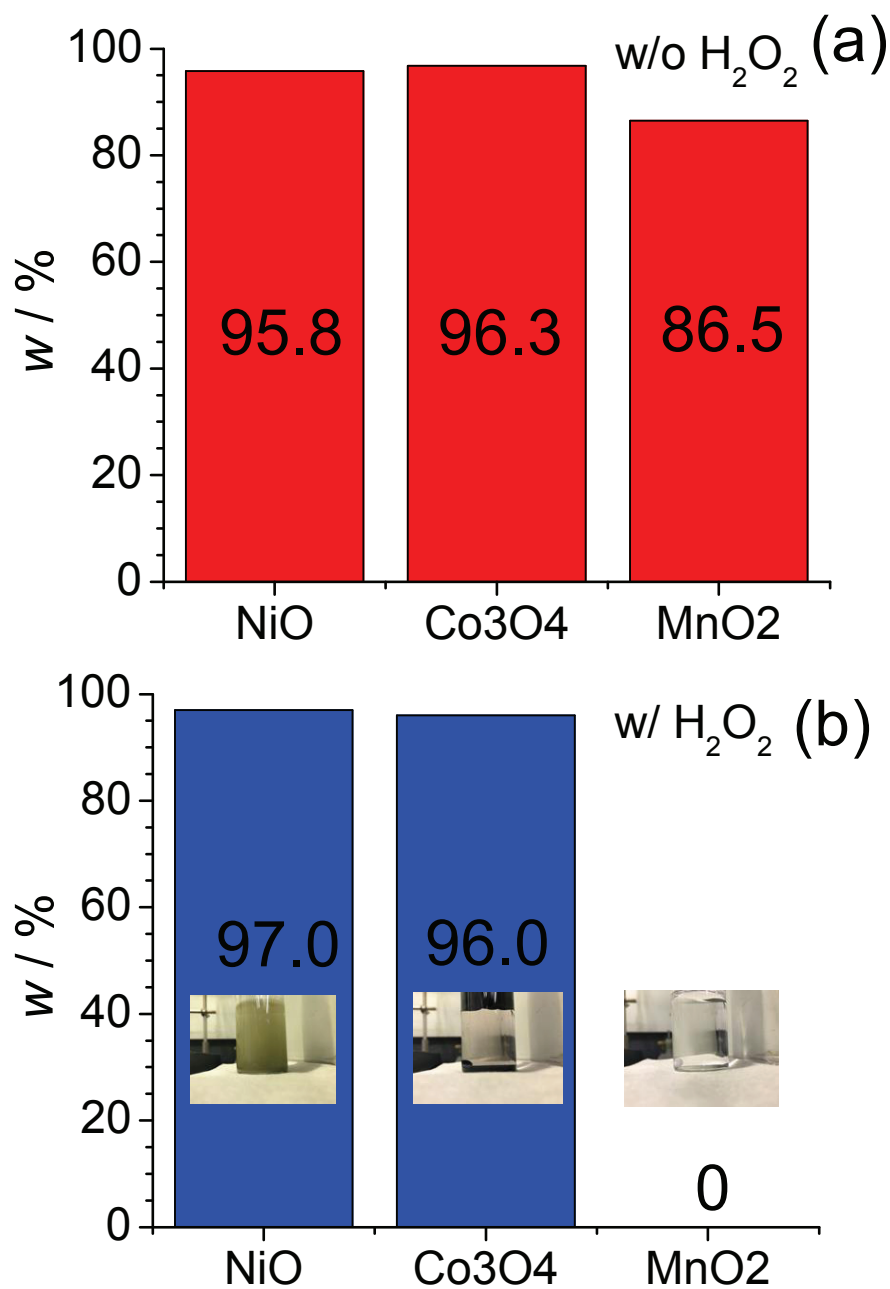

**Fig. S7:** The weight fraction after 24 h of the HNO<sub>3</sub> leaching NiO, Co<sub>3</sub>O<sub>4</sub>, and MnO<sub>2</sub> (a) without H<sub>2</sub>O<sub>2</sub> and (b) with H<sub>2</sub>O<sub>2</sub>. The insets in (b) show photographs after leaching with H<sub>2</sub>O<sub>2</sub>.
